# Supplementary material
Source: HighWire-hosted journal article supplement (https://www.annfammed.org/highwire/filestream/8582/field_highwire_adjunct_files/0/Bailey_Supp_Tables.pdf)
Supplement: Bailey_Supp_Tables.pdf [file Bailey_Supp_Tables.pdf]

## **Supplemental materials for:**

DeVoe JE, Marino M, Gold R, et al. Community health center utilization after Oregon's randomized medicaid experiment. *Ann Fam Med.* 2015;13(4):312-320.

APPENDIX

**Appendix Table 1.** Demographic Characteristics of Effect of Treatment On the Treated Study Sample by Selection Status (N=24,705)

| Characteristic                                   | Selected and gained insurance<br>No. (%)<br>(n = 5,267) | Not Selected and did not gain insurance<br>No. (%)<br>(n = 19,438) | P value <sup>a</sup> |
|--------------------------------------------------|---------------------------------------------------------|--------------------------------------------------------------------|----------------------|
| <b>Sex</b>                                       |                                                         |                                                                    | <0.001               |
| Female                                           | 3,106 (59.0)                                            | 10,883 (56.0)                                                      |                      |
| Male                                             | 2,161 (41.0)                                            | 8,555 (44.0)                                                       |                      |
| <b>Age-group, y<sup>b</sup></b>                  |                                                         |                                                                    | <0.001               |
| 19-29                                            | 1,288 (24.4)                                            | 5,211 (26.8)                                                       |                      |
| 30-29                                            | 1,260 (23.9)                                            | 4,285 (22.1)                                                       |                      |
| 40-49                                            | 1,414 (26.9)                                            | 5,236 (26.9)                                                       |                      |
| 50-59                                            | 1,104 (20.9)                                            | 3,825 (19.7)                                                       |                      |
| 60-64                                            | 201 (3.8)                                               | 881 (4.5)                                                          |                      |
| <b>Race/Ethnicity</b>                            |                                                         |                                                                    | <0.001               |
| Hispanic, any race                               | 532 (10.1)                                              | 2,282 (11.7)                                                       |                      |
| Non-Hispanic, white                              | 3,601 (68.4)                                            | 12,858 (66.2)                                                      |                      |
| Non-Hispanic, other                              | 638 (12.1)                                              | 2,225 (11.4)                                                       |                      |
| Unknown                                          | 496 (9.4)                                               | 2,073 (10.7)                                                       |                      |
| <b>Average federal poverty level<sup>c</sup></b> |                                                         |                                                                    | <0.001               |
| <100%                                            | 3,660 (69.5)                                            | 12,013 (61.8)                                                      |                      |
| ≥100%                                            | 1,087 (20.6)                                            | 5,292 (27.2)                                                       |                      |
| Missing/Unknown                                  | 520 (9.9)                                               | 2,133 (11.0)                                                       |                      |
| <b>Number of chronic conditions<sup>d</sup></b>  |                                                         |                                                                    | 0.08                 |
| Missing/unknown                                  | 1,806 (34.3)                                            | 6,285 (32.3)                                                       |                      |
| 0                                                | 2,667 (50.6)                                            | 10,241 (52.7)                                                      |                      |
| 1                                                | 461 (8.8)                                               | 1,749 (9.0)                                                        |                      |
| 2                                                | 216 (4.1)                                               | 757 (3.9)                                                          |                      |
| 3                                                | 92 (1.8)                                                | 341 (1.8)                                                          |                      |
| 4                                                | 23 (0.4)                                                | 59 (0.3)                                                           |                      |
| 5                                                | 2 (0.04)                                                | 6 (0.03)                                                           |                      |

Note: Oregon OCHIN patients selected to apply for health insurance coverage via the Oregon Experiment and gained insurance compared with those not selected to apply and did not gain insurance.

<sup>a</sup>P values for  $\chi^2$  test unless otherwise noted.

<sup>b</sup>Mean (SD) age was 39.9 (11.8) years for selected patients vs 39.5 (12.1) years for nonselected patients; 2-sided Wilcoxon rank sum test  $P = 0.04$ .

<sup>c</sup>Values ≥1,000% of the federal poverty level (seen in less than 1% of patients)

*This supplemental material has been supplied by the author and has not been edited for content.*

were set to missing.

<sup>d</sup>Diagnosed before selection date; among asthma, coronary artery disease, diabetes, dyslipidemia and hypertension; Missing/unknown indicates that patient had no pre-selection date encounters from which to assess chronic conditions diagnoses.

**Appendix Table 2.** Effect of Treatment On the Treated Outcome Rates by Selection Group (Selected and Gained Insurance: n=5,267; Not Selected and Did Not Gain Insurance: n=19,438)

| <b>Outcome in Postselection Period</b>                   | <b>Rate per 1,000 patients/ month (SE)</b> | <b>Absolute Difference in Rate</b> | <b>Unadjusted Rate Ratio (95% CI)</b> | <b>Adjusted Rate Ratio (95% CI)</b> |
|----------------------------------------------------------|--------------------------------------------|------------------------------------|---------------------------------------|-------------------------------------|
| <b>Total primary care office visits<sup>a</sup></b>      |                                            |                                    |                                       |                                     |
| Selected <sup>b</sup>                                    | 280 (15)                                   | +53 <sup>c</sup>                   | 1.23<br>(1.10-1.39) <sup>c</sup>      | 1.25<br>(1.11-1.41) <sup>c</sup>    |
| Not selected (ref)                                       | 227 (17)                                   | -                                  | 1.00                                  | 1.00                                |
| <b>Total behavioral/mental health visits<sup>d</sup></b> |                                            |                                    |                                       |                                     |
| Selected                                                 | 210 (29)                                   | -25                                | 0.89<br>(0.78-1.03)                   | 0.92<br>(0.77-1.09)                 |
| Not selected                                             | 235 (30)                                   | -                                  | 1.00                                  | 1.00                                |
| <b>Total laboratory tests<sup>e</sup></b>                |                                            |                                    |                                       |                                     |
| Selected                                                 | 370 (30)                                   | +25                                | 1.07<br>(0.93-1.24)                   | 1.08<br>(0.93-1.25)                 |
| Not selected                                             | 345 (39)                                   | -                                  | 1.00                                  | 1.00                                |
| <b>Total referrals<sup>f</sup></b>                       |                                            |                                    |                                       |                                     |
| Selected                                                 | 55 (12)                                    | +18 <sup>c</sup>                   | 1.50<br>(1.20-1.86) <sup>c</sup>      | 1.50<br>(1.27-1.77) <sup>c</sup>    |
| Not selected                                             | 37 (5)                                     | -                                  | 1.00                                  | 1.00                                |
| <b>Total immunizations<sup>g</sup></b>                   |                                            |                                    |                                       |                                     |
| Selected                                                 | 63 (4)                                     | +5                                 | 1.08<br>(1.00-1.17)                   | 1.09<br>(1.01-1.18)                 |
| Not selected                                             | 58 (5)                                     | -                                  | 1.00                                  | 1.00                                |
| <b>Total imaging<sup>h</sup></b>                         |                                            |                                    |                                       |                                     |
| Selected                                                 | 50 (5)                                     | +11 <sup>c</sup>                   | 1.27<br>(1.14-1.43) <sup>c</sup>      | 1.28<br>(1.15-1.43) <sup>c</sup>    |
| Not selected                                             | 39 (2)                                     | -                                  | 1.00                                  | 1.00                                |

CHC = community health center; CPT = Current Procedural Terminology; EHR = electronic health record; HCPCS = Healthcare Common Procedure Coding System; ref = reference group; SE = standard error.

Notes: (1) Rates are zero-Inflated Poisson regression estimates. Adjusted estimates controlled for sex, categorical age, race/ethnicity and below/above federal poverty level as these variables differed significantly between the selection groups at baseline (see Appendix Table 1). (2) All models accounted for clustering of subjects by primary CHC through a robust sandwich variance estimator. (3) Postselection was the 36 months after an applicant was notified of selection to apply for health insurance coverage (the selection date) through the Oregon Experiment, or, for those not selected, a randomly assigned selection date based on the

distribution of selection dates for the selected group. (4) SE denotes robust standard error estimate of the use rate that accounts for clustering of patient within primary CHC.

<sup>a</sup>Face-to-face office visits in a primary care setting and/or with a primary care clinician.

<sup>b</sup>Oregon OCHIN patients selected to apply for health insurance coverage via the Oregon Experiment and gained insurance vs not selected and did not gain insurance.

<sup>c</sup>Statistically significant difference compared with reference group.

<sup>d</sup>Face-to-face encounters designated as behavioral or mental health in the EHR; limited to 11,571 patients seen at 1 or more of the 33 clinics with the behavioral/mental health visit indicator.

<sup>e</sup>CPT and HCPCS codes grouped as labs in the EHR.

<sup>f</sup>CPT and HCPCS codes grouped as referrals in the EHR.

<sup>g</sup>CPT and HCPCS codes grouped as immunizations in the EHR.

<sup>h</sup>CPT and HCPCS codes grouped as imaging in the EHR.
